# Supplementary material for: Mechanical stress determines the configuration of TGFβ activation in articular cartilage
Source: PubMed Central journal article supplement (PMC7969741; doi:10.1038/s41467-021-21948-0), 2021-03-17
Supplement: 41467_2021_21948_MOESM5_ESM.pdf [file 41467_2021_21948_MOESM5_ESM.pdf]

**Title:** Supplementary Movie 1

**Description:** The transaxial and coronal view of micro-CT scan of the medial compartment tibias from 4 months old C57/BL6 mice one-month post-ACLT or sham surgery (left: ACLT, right: sham). The images were sectioned from proximal to distal in parallel.
